# Supplementary material for: Clinical and Microbiologic Analysis of Klebsiella pneumoniae Infection: Hypermucoviscosity, Virulence Factor, Genotype, and Antimicrobial Susceptibility
Source: MDPI journal article supplement (doi:10.3390/diagnostics14080792), 2024-04-10
Supplement: s1 [file s1]

**Table S4.** Antimicrobial resistance and microbiological characteristics of *Klebsiella pneumoniae* isolates according to aerobactin positivity.

|                                | Aerobactin (–)<br>(n = 244) | Aerobactin (+)<br>(n = 170) | p Value |
|--------------------------------|-----------------------------|-----------------------------|---------|
| Antimicrobial resistance rates |                             |                             |         |
| Amikacin                       | 12 (4.9)                    | 7 (4.1)                     | 0.702   |
| Amoxicillin/clavulanate        | 100 (41.0)                  | 23 (13.5)                   | <0.001  |
| Aztreonam                      | 113 (46.3)                  | 24 (14.1)                   | <0.001  |
| Cefazolin                      | 116 (47.5)                  | 24 (14.1)                   | <0.001  |
| Cefepime                       | 111 (45.5)                  | 24 (14.1)                   | <0.001  |
| Cefotaxime                     | 113 (46.3)                  | 24 (14.1)                   | <0.001  |
| Cefoxitin                      | 30 (12.3)                   | 18 (10.6)                   | 0.594   |
| Ceftazidime                    | 113 (46.3)                  | 24 (14.1)                   | <0.001  |
| Ciprofloxacin                  | 94 (38.5)                   | 17 (10.0)                   | <0.001  |
| Ertapenem                      | 0                           | 0                           | n/a     |
| Gentamicin                     | 56 (23.0)                   | 16 (9.4)                    | <0.001  |
| Imipenem                       | 0                           | 0                           | n/a     |
| Piperacillin/tazobactam        | 80 (32.8)                   | 20 (11.8)                   | <0.001  |
| Tigecycline                    | 33 (13.5)                   | 11 (6.5)                    | 0.022   |
| Trimethoprim/sulfamethoxazole  | 97 (39.8)                   | 4 (2.4)                     | <0.001  |
| ESBL positivity                | 111 (45.5)                  | 24 (14.1)                   | <0.001  |
| Serotype                       |                             |                             |         |
| K1                             | 11 (4.5)                    | 66 (38.8)                   | <0.001  |
| K2                             | 16 (6.6)                    | 43 (25.3)                   | <0.001  |
| K5                             | 2 (0.8)                     | 1 (0.6)                     | 0.999   |
| K20                            | 6 (2.5)                     | 13 (7.6)                    | 0.013   |
| K54                            | 3 (1.2)                     | 1 (0.6)                     | 0.647   |
| K57                            | 2 (0.8)                     | 14 (8.2)                    | <0.001  |
| ND                             | 204 (83.6)                  | 32 (18.8)                   | <0.001  |
| Virulence gene                 |                             |                             |         |
| <i>rmpA</i>                    | 6 (2.5)                     | 159 (93.5)                  | <0.001  |
| <i>magA</i>                    | 3 (1.2)                     | 60 (35.3)                   | <0.001  |
| <i>allS</i>                    | 8 (3.3)                     | 72 (42.4)                   | <0.001  |
| <i>mrkD</i>                    | 237 (97.9)                  | 167 (98.2)                  | 0.999*  |
| <i>entB</i>                    | 239 (98.8)                  | 169 (99.4)                  | 0.646*  |
| <i>kfu</i>                     | 60 (24.8)                   | 78 (45.9)                   | <0.001  |
| <i>aerobactin</i>              |                             |                             |         |
| String test                    | 33 (13.5)                   | 122 (71.8)                  | <0.001  |
| Biofilm mass                   | 0.65 ± 0.36                 | 0.76 ± 0.65                 | 0.059   |

Values are presented as n (%) or mean ± standard deviation.

\*Fisher's exact test.

n/a: not available; ESBL: extended-spectrum β-lactamase; ND: not detected.
