# Supplementary material for: Clinical and Microbiologic Analysis of Klebsiella pneumoniae Infection: Hypermucoviscosity, Virulence Factor, Genotype, and Antimicrobial Susceptibility
Source: MDPI journal article supplement (doi:10.3390/diagnostics14080792), 2024-04-10
Supplement: s1 [file s1]

**Table S2.** Antimicrobial resistance and microbiological characteristics of *Klebsiella pneumoniae* isolates according to hypermucoviscosity.

|                                | String (–) (n = 259) | String (+) (n = 155) | p Value |
|--------------------------------|----------------------|----------------------|---------|
| Antimicrobial resistance rates |                      |                      |         |
| Amikacin                       | 15 (5.8)             | 4 (2.6)              | 0.131   |
| Amoxicillin/clavulanate        | 109 (42.1)           | 14 (9.0)             | <0.001  |
| Aztreonam                      | 122 (47.1)           | 15 (9.7)             | <0.001  |
| Cefazolin                      | 124 (47.9)           | 16 (10.3)            | <0.001  |
| Cefepime                       | 120 (46.3)           | 15 (9.7)             | <0.001  |
| Cefotaxime                     | 121 (46.7)           | 16 (10.3)            | <0.001  |
| Cefoxitin                      | 34 (13.1)            | 14 (9.0)             | 0.208   |
| Ceftazidime                    | 121 (46.7)           | 16 (10.3)            | <0.001  |
| Ciprofloxacin                  | 98 (37.8)            | 13 (8.4)             | <0.001  |
| Ertapenem                      | 0                    | 0                    | n/a     |
| Gentamicin                     | 62 (23.9)            | 10 (6.5)             | <0.001  |
| Imipenem                       | 0                    | 0                    | n/a     |
| Piperacillin/tazobactam        | 90 (34.7)            | 10 (6.5)             | <0.001  |
| Tigecycline                    | 33 (12.7)            | 11 (7.1)             | 0.071   |
| Trimethoprim/sulfamethoxazole  | 92 (35.5)            | 9 (5.8)              | <0.001  |
| ESBL positivity                | 120 (46.3)           | 15 (9.7)             | <0.001  |
| Serotype                       |                      |                      |         |
| K1                             | 16 (6.2)             | 61 (39.4)            | <0.001  |
| K2                             | 15 (5.8)             | 44 (28.4)            | <0.001  |
| K5                             | 2 (0.8)              | 1 (0.6)              | 0.999   |
| K20                            | 11 (4.2)             | 8 (5.2)              | 0.667   |
| K54                            | 2 (0.8)              | 2 (1.3)              | 0.632   |
| K57                            | 3 (1.2)              | 13 (8.4)             | <0.001  |
| ND                             | 210 (81.1)           | 26 (16.8)            | <0.001  |
| Virulence gene                 |                      |                      |         |
| <i>rmpA</i>                    | 43 (16.6)            | 122 (78.7)           | <0.001  |
| <i>magA</i>                    | 15 (5.8)             | 48 (31.0)            | <0.001  |
| <i>allS</i>                    | 22 (8.6)             | 58 (37.4)            | <0.001  |
| <i>mrkD</i>                    | 252 (98.1)           | 152 (98.1)           | 0.999   |
| <i>entB</i>                    | 253 (98.4)           | 155 (100.0)          | 0.302   |
| <i>kfu</i>                     | 71 (27.6)            | 67 (43.2)            | 0.001   |
| <i>aerobactin</i>              | 48 (18.5)            | 122 (78.7)           | <0.001  |
| String test                    |                      |                      |         |
| Biofilm mass                   | 0.68 ± 0.40          | 0.72 ± 0.64          | 0.521   |

Values are presented as n (%) or mean ± standard deviation.

n/a: not available; ESBL: extended-spectrum β-lactamase; ND: not detected.
