# Supplementary material for: Clinical and Microbiologic Analysis of Klebsiella pneumoniae Infection: Hypermucoviscosity, Virulence Factor, Genotype, and Antimicrobial Susceptibility
Source: MDPI journal article supplement (doi:10.3390/diagnostics14080792), 2024-04-10
Supplement: s1 [file s1]

**Table S3.** Baseline characteristics and clinical presentations of *Klebsiella pneumoniae* isolates according to aerobactin positivity.

|                                    | Aerobactin (–)<br>(n = 244) | Aerobactin (+)<br>(n = 170) | p Value |
|------------------------------------|-----------------------------|-----------------------------|---------|
| Epidemiology                       |                             |                             |         |
| Male sex                           | 134 (54.9)                  | 114 (67.1)                  | 0.013*  |
| Age (years)                        | 67.55 ± 13.68               | 68.12 ± 12.90               | 0.673   |
| Underlying diseases                |                             |                             |         |
| Solid tumor                        | 87 (35.7)                   | 32 (18.8)                   | <0.001  |
| Chronic liver disease              | 29 (11.9)                   | 21 (12.4)                   | 0.886   |
| Neurological disease               | 102 (41.8)                  | 67 (39.4)                   | 0.626   |
| Chronic renal disease              | 29 (11.9)                   | 10 (5.9)                    | 0.040   |
| Diabetes mellitus                  | 80 (32.8)                   | 66 (38.8)                   | 0.206   |
| Chronic lung disease               | 26 (10.7)                   | 16 (9.4)                    | 0.680   |
| Solid-organ transplantation        | 11 (4.5)                    | 1 (0.6)                     | 0.018*  |
| McCabe classification              |                             |                             |         |
| Nonfatal underlying disease        | 174 (71.3)                  | 141 (82.9)                  | 0.006   |
| Ultimately fatal disease           | 70 (28.7)                   | 29 (17.1)                   |         |
| Predisposing factors               |                             |                             |         |
| Urinary catheter                   | 122 (50.0)                  | 73 (42.9)                   | 0.157   |
| Percutaneous catheter drainage     | 43 (17.6)                   | 45 (26.5)                   | 0.030   |
| L-tube                             | 68 (27.9)                   | 26 (15.3)                   | 0.003   |
| Invasive procedure                 | 58 (23.8)                   | 59 (34.7)                   | 0.015   |
| Recent operation                   | 55 (22.5)                   | 18 (10.6)                   | 0.002   |
| Prior ICU admission within 1 month | 40 (16.4)                   | 15 (8.8)                    | 0.026   |
| Category of infection              |                             |                             |         |
| Community-acquired infection       | 69 (28.3)                   | 98 (57.6)                   | <0.001  |
| Healthcare-associated infection    | 52 (21.3)                   | 28 (16.5)                   | 0.220   |
| Nosocomial infection               | 123 (50.4)                  | 44 (25.9)                   | <0.001  |
| Infection source                   |                             |                             |         |
| Urinary tract infection            | 69 (28.3)                   | 19 (11.2)                   | <0.001  |
| Intra-abdominal infection          | 57 (23.4)                   | 57 (33.5)                   | 0.023   |
| Respiratory infection              | 88 (36.1)                   | 75 (44.1)                   | 0.099   |
| Clinical presentation              |                             |                             |         |
| Severe sepsis and septic shock     | 85 (34.8)                   | 49 (28.8)                   | 0.198   |
| Metastatic infection               | 1 (0.4)                     | 4 (2.4)                     | 0.164   |
| Concomitant bacteremia             | 85 (34.8)                   | 57 (33.5)                   | 0.783   |
| Mechanical ventilation             | 36 (14.8)                   | 31 (18.2)                   | 0.344   |
| Admission to ICU                   | 55 (22.5)                   | 51 (30.0)                   | 0.087   |
| Treatment outcomes                 |                             |                             |         |
| Treatment failure (72 h)           | 38 (15.6)                   | 32 (18.8)                   | 0.385   |
| Infection-related 30-day mortality | 25 (12.4)                   | 19 (15.3)                   | 0.450   |
| Acute kidney injury                | 32 (13.1)                   | 19 (11.2)                   | 0.555   |

Values are presented as n (%) or mean ± standard deviation.

\*Fisher's exact test.

ICU: intensive care unit.
