# Supplementary material for: Clinical and Microbiologic Analysis of Klebsiella pneumoniae Infection: Hypermucoviscosity, Virulence Factor, Genotype, and Antimicrobial Susceptibility
Source: MDPI journal article supplement (doi:10.3390/diagnostics14080792), 2024-04-10
Supplement: s1 [file s1]

**Table S1.** Baseline characteristics and clinical presentations of *Klebsiella pneumoniae* isolates according to hypermucoviscosity.

|                                    | String (–) (n = 259) | String (+) (n = 155) | p Value |
|------------------------------------|----------------------|----------------------|---------|
| Epidemiology                       |                      |                      |         |
| Male sex                           | 141 (54.4)           | 107 (69.0)           | 0.003   |
| Age (years)                        | 68.18 ± 13.48        | 67.13 ± 13.15        | 0.440   |
| Underlying diseases                |                      |                      |         |
| Solid tumor                        | 88 (34.0)            | 31 (20.0)            | 0.002   |
| Chronic liver disease              | 27 (10.4)            | 23 (14.8)            | 0.182   |
| Neurological disease               | 114 (44.0)           | 55 (35.5)            | 0.087   |
| Chronic renal disease              | 29 (11.2)            | 10 (6.5)             | 0.110   |
| Diabetes mellitus                  | 94 (36.3)            | 52 (33.5)            | 0.572   |
| Chronic lung disease               | 27 (10.4)            | 15 (9.7)             | 0.807   |
| Solid-organ transplantation        | 9 (3.5)              | 3 (1.9)              | 0.547   |
| McCabe classification              |                      |                      |         |
| Nonfatal underlying disease        | 187 (72.2)           | 128 (82.6)           | 0.017   |
| Ultimately fatal disease           | 72 (27.8)            | 27 (17.4)            |         |
| Predisposing factors               |                      |                      |         |
| Urinary catheter                   | 133 (51.4)           | 62 (40.0)            | 0.025   |
| Percutaneous catheter drainage     | 44 (17.0)            | 44 (28.4)            | 0.006   |
| L-tube                             | 74 (28.6)            | 20 (12.9)            | <0.001  |
| Invasive procedure                 | 59 (22.8)            | 58 (37.4)            | 0.001   |
| Recent operation                   | 55 (21.2)            | 18 (11.6)            | 0.013   |
| Prior ICU admission within 1 month | 47 (18.1)            | 8 (5.2)              | <0.001  |
| Category of infection              |                      |                      |         |
| Community-acquired infection       | 72 (27.8)            | 95 (61.3)            | <0.001  |
| Healthcare-associated infection    | 55 (21.2)            | 25 (16.1)            | 0.203   |
| Nosocomial infection               | 132 (51.0)           | 35 (22.6)            | <0.001  |
| Infection source                   |                      |                      |         |
| Urinary tract infection            | 72 (27.8)            | 16 (10.3)            | <0.001  |
| Intra-abdominal infection          | 57 (22.0)            | 57 (36.8)            | 0.001   |
| Respiratory infection              | 100 (38.6)           | 63 (40.6)            | 0.682   |
| Clinical presentation              |                      |                      |         |
| Severe sepsis and septic shock     | 87 (33.6)            | 47 (30.3)            | 0.492   |
| Metastatic infection               | 1 (0.4)              | 4 (2.6)              | 0.068   |
| Concomitant bacteremia             | 83 (32.0)            | 59 (38.1)            | 0.212   |
| Mechanical ventilation             | 37 (14.3)            | 30 (19.4)            | 0.175   |
| Admission to ICU                   | 62 (23.9)            | 44 (28.4)            | 0.315   |
| Treatment outcomes                 |                      |                      |         |
| Treatment failure (72 h)           | 41 (15.8)            | 29 (18.7)            | 0.449   |
| Infection-related 30-day mortality | 26 (12.3)            | 18 (15.7)            | 0.400   |

Values are presented as n (%) or mean ± standard deviation.  
ICU: intensive care unit.
